# Supplementary material
Source: publisher figshare collection journal article supplement (https://acs.figshare.com/ndownloader/files/21216612)
Supplement: Supplementary file 1 [file 21216612]

## Supporting Information

### NMR experiments for studies of dilute and condensed protein phases: Application to the phase-separating protein CAPRIN1

Leo E. Wong<sup>1-3‡</sup>, Tae Hun Kim<sup>1-4‡</sup>, D. Ranjith Muhandiram<sup>1-3</sup>, Julie D. Forman-Kay<sup>2,4</sup> and Lewis E. Kay<sup>1-4\*</sup>

<sup>1</sup>Department of Molecular Genetics, University of Toronto, Toronto, Ontario M5S 1A8, Canada

<sup>2</sup>Department of Biochemistry, University of Toronto, Toronto, Ontario M5S 1A8, Canada

<sup>3</sup>Department of Chemistry, University of Toronto, Toronto, Ontario M5S 1A8, Canada

<sup>4</sup>Hospital for Sick Children, Program in Molecular Medicine, 555 University Avenue, Toronto, Ontario M5G 1X8, Canada

‡These authors contributed equally.

\*Corresponding author: [kay@pound.med.utoronto.ca](mailto:kay@pound.med.utoronto.ca)

### **Comparative study of haCONHA and HNCO datasets recorded under identical conditions**

It is of interest to compare signal-to-noise values of  $^1\text{H}^\alpha$ - and  $^1\text{H}^\text{N}$ -detect spectra that record  $^{15}\text{N}$  and  $^{13}\text{CO}$  chemical shifts. We have examined datasets recorded on CAPRIN1 at pH 5.5, 25°C where the effects of solvent hydrogen exchange on the quality of HNCO spectra are expected to be tolerable, in general, and at pH 7.4, 25°C, where exchange is predicted to be pathologic. As HNCO datasets also include correlations from Gly residues, a compromise  $\tau_2$  delay was chosen for recording the haCONHA (2.3 ms, scheme of Figure 2A, using coherence selection that affords better water suppression) so that all residue-types are present in the spectra. Cross-peaks in the HNCO measured at pH 5.5 are of higher sensitivity, on average by a factor of 2.5-3 for correlations where magnetization does not originate on either of Ser or Gly (Figure S5A) and more for Ser or Gly (see legend to Figure S5). The variation in relative sensitivity on a per-residue basis that is observed in Figure S5 reflects, in part, residue-specific relaxation that is more acute for the haCONHA as the pulse scheme is longer than for the HNCO as well as different contributions to each residue from solvent exchange in the HNCO dataset that can be non-negligible even at pH 5.5. It is worth emphasizing that an advantage of the haCONHA is that correlations involving Pro residues can also be obtained, unlike for the HNCO, although the HNCO remains the far superior experiment for applications to IDPs at lower pH. We have also performed a similar comparison on a dilute sample prepared at pH 7.4 and it is clear that the HNCO experiment is not viable, with the majority of expected cross peaks not observed. Notably, however, four HNCO correlations are of higher sensitivity than for the haCONHA. These originate from the C-terminal two residues and from a pair of Asp residues that are part of the IsoAsp-Gly linkages, as discussed in the main text. Recognizing the limitations of the HNCO scheme<sup>1</sup> that has been used here, we have designed an improved HNCO sequence for studies of protein systems with fast exchanging amides based on the CP-HISQC approach of Yuwen and Skrynnikov<sup>2</sup>. In this implementation solvent exchange can be exploited to increase the transfer of magnetization from  $^1\text{H}^\text{N}$  to  $^{15}\text{N}$  during an initial cross-polarization element. Indeed, the ‘new’ HNCO was,

on average, a factor of two more sensitive than the previous version, but S/N ratios ('new' HNCO vs haCONHA) for 2/3 of the correlations were still under 0.1.

## Supporting Figures

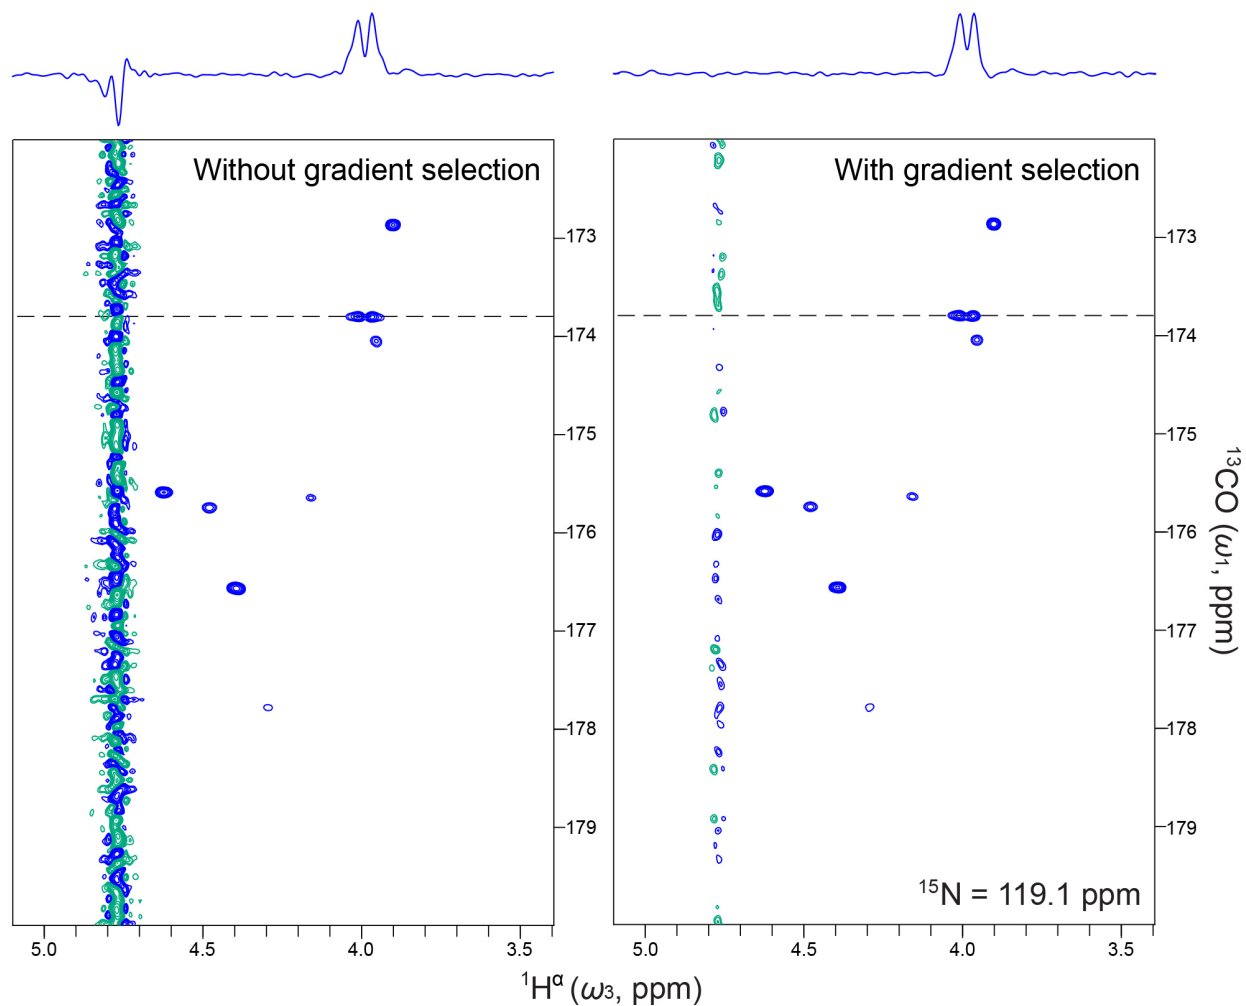

Figure S1. Comparison of water suppression levels obtained using haCONHA schemes of Figure 2C (left) and 2D (right). Separate 3D datasets were recorded on a dilute CAPRIN1 sample (25mM MES, pH 5.5) in a 5-mm tube at 25°C (98% H<sub>2</sub>O, 2% D<sub>2</sub>O) with  $\tau_2 = 2.3$  ms, using NUS, to give measurement times of 5 hours/dataset. A pair of planes are illustrated (<sup>15</sup>N shift of 119.1 ppm), along with a horizontal trace at a <sup>13</sup>CO shift of 173.8 ppm (dashed line) that emphasizes the improved water suppression with scheme 2D.

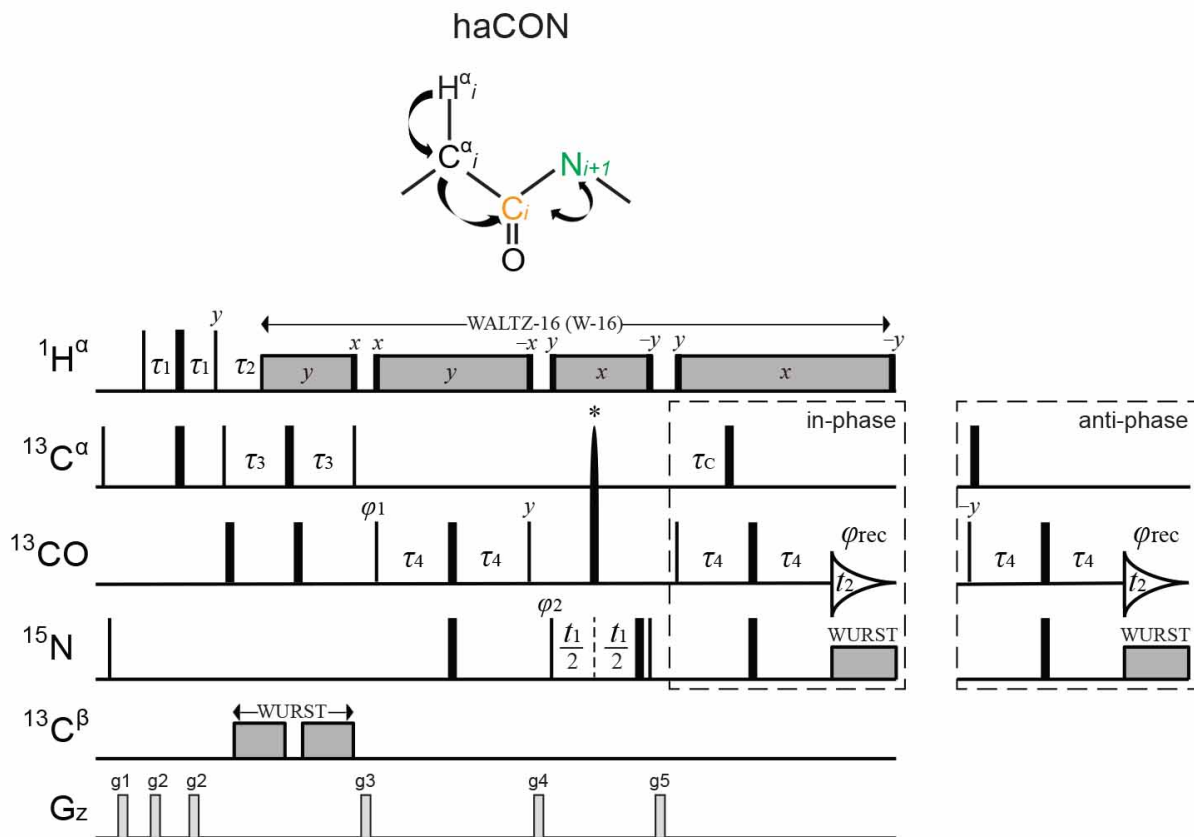

Figure S2. (A) Pulse sequence of the haCON for recording correlations of the form ( $^{15}\text{N}_{i+1}$ ,  $^{13}\text{CO}_i$ ). All  $90^\circ$  ( $180^\circ$ ) rectangular pulses are denoted by narrow (wide) bars and are applied along the x-axis unless otherwise indicated.  $^1\text{H}$ ,  $^{13}\text{C}$ , and  $^{15}\text{N}$  carriers are placed on water ( $\sim 4.7$  ppm), 58 ppm (until immediately before the  $^{13}\text{CO}$  pulse of phase  $\varphi_1$  when the carrier is jumped to 176 ppm for the remainder of the sequence), and 119 ppm, respectively. Composite pulse decoupling is denoted by grey boxes; in the event that decoupling is not along the x axis the phase is indicated inside the box.  $^1\text{H}$  WALTZ-16 decoupling<sup>3</sup> as well as the flanking  $90^\circ$  pulses are applied with a field of  $\sim 6.25$  kHz.  $^{13}\text{C}^\alpha$  and  $^{13}\text{CO}$   $90^\circ$  and  $180^\circ$  rectangular pulses are applied with fields of  $\Delta\Omega/\sqrt{15}$  and  $\Delta\Omega/\sqrt{3}$ , respectively, where  $\Delta\Omega = 118$  ppm<sup>4</sup>. A Bloch-Siegert compensation pulse ( $^{13}\text{CO}$ ) is applied at the start of the  $\tau_3$  period<sup>5</sup>. The  $400\ \mu\text{s}$   $^{13}\text{C}$  adiabatic pulse denoted by an asterisk is applied with a field of  $\sim 11$  kHz, 80 kHz sweep and centered at 117 ppm; its duration is compensated through the addition of a delay equal to the pulse width immediately after the  $^{15}\text{N}$   $180^\circ$  pulse that follows the  $t_1$  period. Decoupling during  $t_2$  is achieved using an  $^{15}\text{N}$  WURST scheme with a sweep from 99 to 139 ppm<sup>6</sup>. The delays used are:  $\tau_1 = 1.8$  ms,  $\tau_3 = 4.5$  ms,  $\tau_4 = 15$  ms and  $\tau_c = 4.76$  ms (corresponding to  $^1J_{\text{CACO}}$  of 52.5 Hz). The delay  $\tau_2$  is set to either 3.6 ms (for  $^{13}\text{CH}$ ) or 2.3 ms (both  $^{13}\text{CH}$  and  $^{13}\text{CH}_2$ ).  $^{13}\text{C}^\beta$  WURST decoupling<sup>7</sup> is achieved using a waveform described in the legend to Figure 2. Removal of  $^{13}\text{CO}$ - $^{13}\text{C}^\alpha$  couplings in  $F_2$  results from combining in-phase and anti-phase spectra acquired in an interleaved manner<sup>8,9</sup>. The phase cycle used is:  $\varphi_1 = 2(x), 2(-x)$ ;  $\varphi_2 = x, -x$ ; and  $\varphi_{\text{rec}} = x, 2(-x), x$ . Quadrature detection in  $t_1$  is achieved by STATES-TPPI<sup>10</sup> of  $\varphi_2$ . Gradients are applied with the following durations (ms) and strengths (in % maximum): g1: (1.0, 14%), g2: (1.0, 17%), g3: (1.0, 27%),

g4: (1.0, 41%), g5: (1.0, 33%). The magnetization transfer pathway is depicted as a cartoon, where chemical shift encoding is color-coded as  $t_1$  (green) and  $t_2$  (gold).

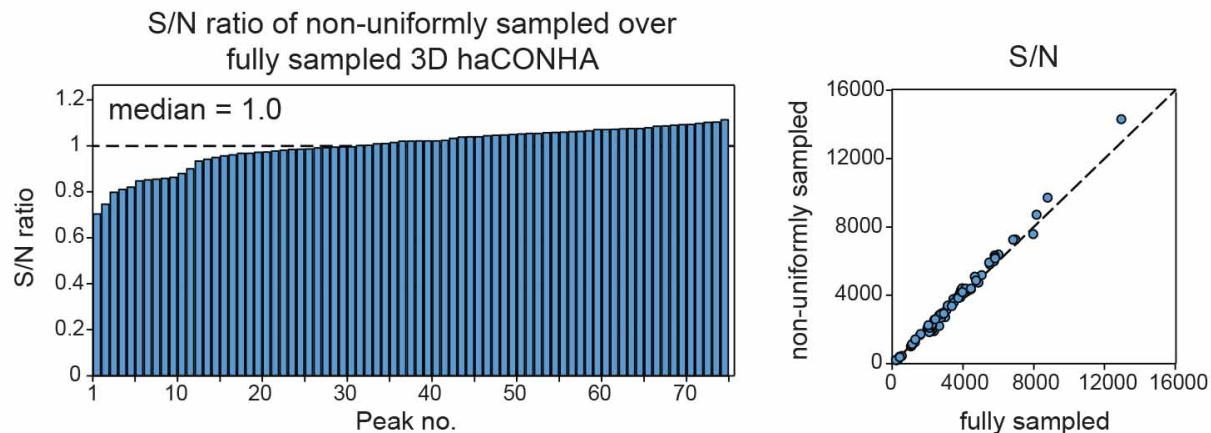

Figure S3. Comparison of S/N ratios of correlations in haCONHA spectra, acquired with uniform sampling and NUS (ratio = NUS/fully sampled). Data is sorted from lowest to highest S/N ratios. Datasets (pulse scheme of Figure 2A using gradient coherence transfer selection, panel D) were measured on a dilute CAPRIN1 sample (25 mM sodium phosphate, pH 7.4) at 30 °C with  $\tau_2 = 3.6$  ms (selection of AX spin systems),  $t_{1\text{max}} = 64$  ms,  $t_{2\text{max}} = 55$  ms,  $t_{3\text{max}} = 64$  ms. The number of scans for the fully sampled and NUS (25.5 %) spectra are 2 and 8, respectively, for a total measurement time of 21 hours for both experiments.

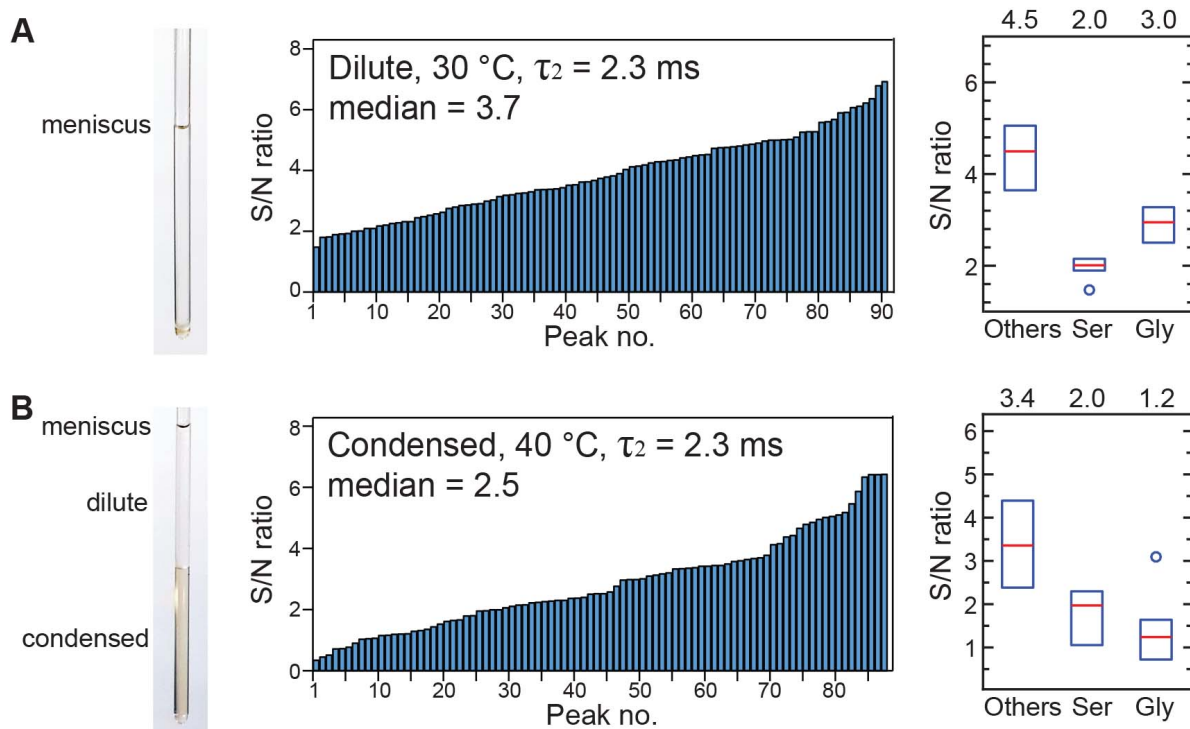

Figure S4. Comparison of S/N ratios ( $^1\text{H}$  detect/ $^{13}\text{C}$  detect) in spectra of haCONHA (3D;  $^1\text{H}^\alpha$  detected using the sequence of Figure 2A with gradient coherence selection) and 2D haCON (2D;  $^{13}\text{C}$ -detected) recorded on a sample of (A) dilute CAPRIN1 (25 mM NaPi, pH 7.4, 30°C, 5 mm NMR tube) or (B) condensed CAPRIN1 (25 mM NaPi, pH 7.4, 100 mM NaCl, 40°C, 3 mm NMR tube). Details are as in the legend to Figure 3 with the exception that  $\tau_2=2.3$  ms so that signals from all amino acids are observed. Identical net spectral acquisition times (21 hr) were used for all datasets, acquired with uniform sampling. To the right of each histogram is shown 'box plots', as in Figure 3, with the median highlighted in red and indicated above each box.



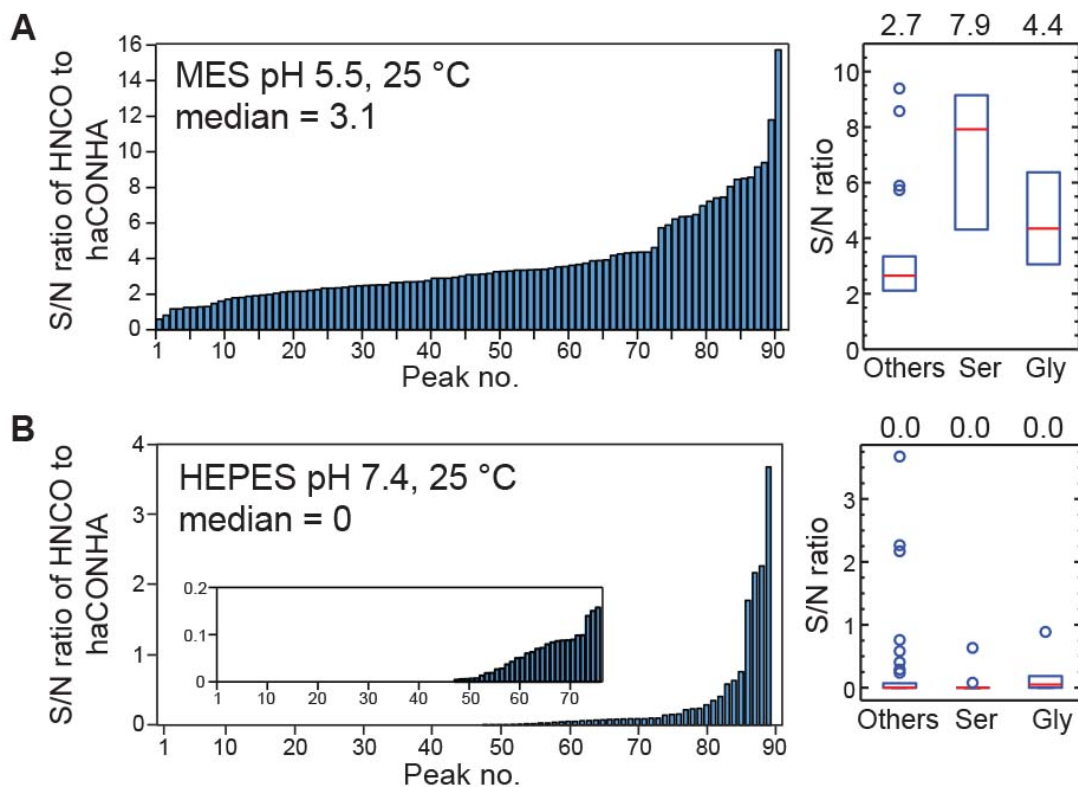

Figure S5. Comparison of signal-to-noise (S/N) ratios in HNCO (sensitivity enhanced pulse scheme with water flip-back<sup>1</sup>) and haCONHA (sequence of Figure 2A, with scheme D) 3D spectra. Datasets were recorded on dilute samples of either 25 mM MES, pH 5.5, 25°C (A) or 25 mM HEPES, pH 7.4, 25°C (B). All residues, including Gly, were selected in the haCONHA experiments by setting  $\tau_2=2.3$  ms in the scheme of Figure 2A. Additional experimental details are provided in Table S1. Residues were analyzed by first dividing them into 3 groups corresponding to “Others”, Ser, and Gly, with the median S/N ratio for each group denoted by red lines and indicated numerically on top of each box; other details are as in Figure 3. Calculated S/N ratios, neglecting relaxation, are 2.1, 7.1 and 2.5 for ‘Others’, ‘Ser’, and ‘Gly’, respectively (see below). The lower calculated vs experimental value in the case of Gly likely reflects relaxation losses in the haCONHA during the intervals that include the defocusing and refocusing of  $^{13}\text{C}^\alpha$  magnetization with respect to the attached  $^{13}\text{CO}$  spin that are more significant for this residue than other amino acids for which only a single proton is attached to the  $\text{C}^\alpha$  carbon. In addition, despite the fact that the  $^{13}\text{C}^\beta$  decoupling waveform does not encompass the Gly  $^{13}\text{C}^\alpha$  chemical shift region we have observed

that there is still an effect on  $^{13}\text{C}^\alpha$  magnetization for this amino acid, leading to additional sensitivity losses. In (B), a value of 0 is assigned to peaks that could not be detected.

S/N ratios (HNCO/haCONHA) were calculated by neglecting relaxation during the delays in the pulse schemes as well as any losses in the HNCO due to solvent hydrogen exchange (low pH limit) using the following equations:

$$\text{“Others”}: \text{S/N} = \frac{\sqrt{2}}{\sin^2(\pi J_{HC} \tau_2) \frac{1 + \sin(\pi J_{HC} \tau_2)}{2}}$$

$$\text{Ser}: \text{S/N} = \frac{\sqrt{2}}{\sin^2(\pi J_{HC} \tau_2) \frac{1 + \sin(\pi J_{HC} \tau_2)}{2} \cos^2(2\pi J_{CC} \tau_3)}$$

$$\text{Gly}: \text{S/N} = \frac{\sqrt{2}}{\sin^2(2\pi J_{HC} \tau_2) \frac{\cos(\pi J_{HC} \tau_2) + \sin(\pi J_{HC} \tau_2)}{2}}$$

where  $J_{HC}$  is the one-bond  $^1\text{H}^\alpha$ - $^{13}\text{C}^\alpha$  scalar coupling (140 Hz) and the  $\tau_i$  values are as in Figure 2A. In these expressions the factor of  $\sqrt{2}$  in the numerator derives from the fact that the HNCO scheme is recorded in sensitivity-enhanced mode<sup>11,12</sup>, the factors  $\sin^2(\pi J_{HC} \tau_2)$  (“Others” or Ser; AX spin systems) and  $\sin^2(2\pi J_{HC} \tau_2)$  (Gly; AX<sub>2</sub> spin system) account for the losses in the haCONHA from the compromise  $\tau_2$  delay used to refocus/defocus anti/in-phase  $^{13}\text{C}^\alpha$  magnetization (2.3 ms). The  $\cos^2(2\pi J_{CC} \tau_3)$  factor for Ser is due to the evolution of  $^{13}\text{C}^\alpha$  magnetization from the one-bond  $^{13}\text{C}^\alpha$ - $^{13}\text{C}^\beta$  scalar coupling that is not decoupled, as the  $^{13}\text{C}^\beta$  decoupling bandwidth does not extend to include the Ser  $^{13}\text{C}^\beta$  chemical shift range (see text). Finally, the additional terms in the equations include further losses from the gradient selected element at the end of the scheme of Figure 2D, as described in the text. It should be noted that the expression for Gly S/N includes contributions from both  $\text{H}^\alpha$  protons; both protons were included in evaluating the S/N experimentally.

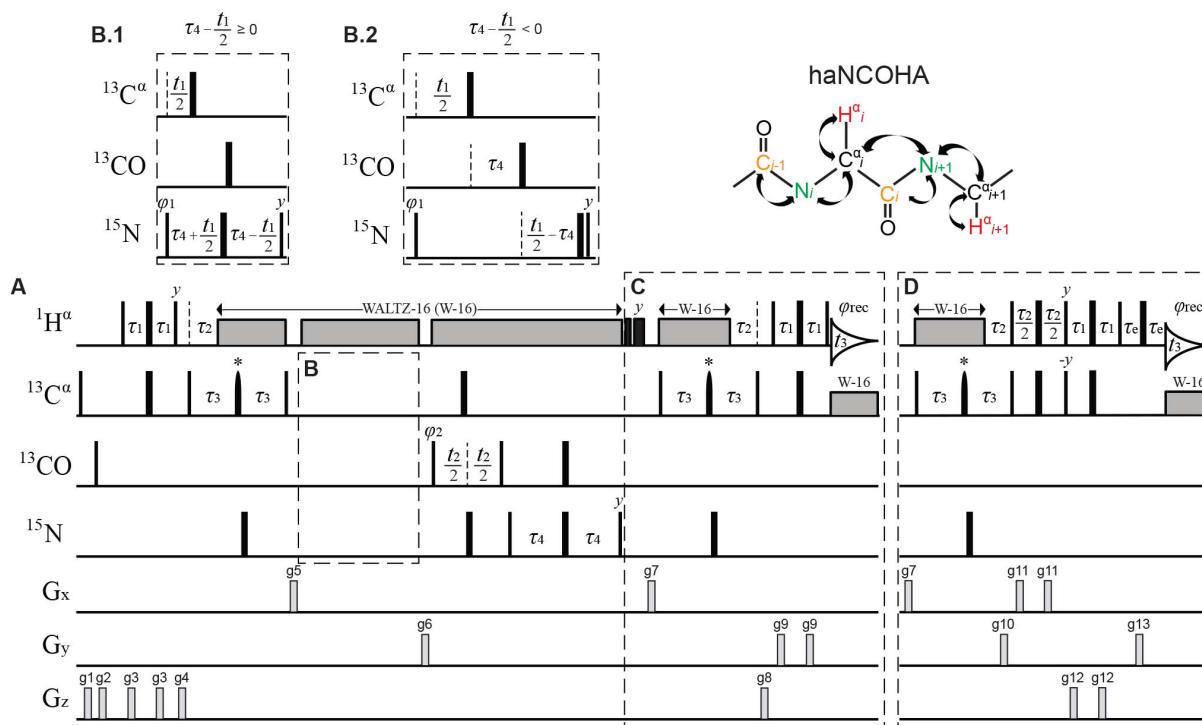

Figure S6. (A) haNCOHA pulse scheme providing correlations of the form ( $^{15}\text{N}_{i+1}, ^{13}\text{CO}_i, ^1\text{H}^\alpha_i$ ) and ( $^{15}\text{N}_i, ^{13}\text{CO}_{i-1}, ^1\text{H}^\alpha_i$ ). The magnetization transfer pathway is illustrated along with nuclei whose chemical shifts are encoded, color-coded as  $t_1$  (green),  $t_2$  (gold), and  $t_3$  (red). Many of the details have been described in Figure 2 and are not repeated here.  $^1\text{H}$ ,  $^{13}\text{C}$ , and  $^{15}\text{N}$  carriers are placed on water ( $\sim 4.7$  ppm), 58 ppm (until immediately before the  $^{13}\text{CO}$  pulse of phase  $\varphi_2$  when the carrier is jumped to 176 ppm and then returned to 58 ppm after the  $^{13}\text{CO}$   $90^\circ$  pulse that completes the  $t_2$  evolution period), and 119 ppm, respectively. The  $^{13}\text{C}$  pulses denoted by asterisks have the REBURP shape<sup>13</sup>, are applied with sufficient power to cover the complete aliphatic bandwidth ( $\sim 15.7$  kHz, 400  $\mu\text{s}$  at 600 MHz) and are centered at 43 ppm. The delays are:  $\tau_1 = 1.8$  ms,  $\tau_2 = 3.6$  ms ( $^{13}\text{CH}$ ) or 2.3 ms ( $^{13}\text{CH} + ^{13}\text{CH}_2$ ),  $\tau_3 = 13.5$  ms,  $\tau_4 = 15$  ms. A shared constant-time acquisition scheme<sup>14,15</sup> is used for recording  $^{15}\text{N}$  (B.1 and B.2). Back-transfer of magnetization to  $^1\text{H}^\alpha$  is achieved with either scheme (C) or (D), with the gradient selection approach of (D) recommended for water samples. The phase cycle is:  $\varphi_1 = x, -x$ ;  $\varphi_2 = 2(x), 2(-x)$ ; and  $\varphi_{\text{rec}} = x, 2(-x), x$ . Quadrature detection in  $t_1$  and  $t_2$  is achieved by STATES-TPPI<sup>10</sup> of  $\varphi_1$  and  $\varphi_2$ , respectively. Gradients are applied with the following durations (ms) and strengths (in % maximum): g1: (0.5, 24%), g2: (1.0, 24%), g3: (0.256, 15%), g4: (1.0, 40%), g5: (1.25, 80%), g6: (0.8, 60%), g7: (1.5, 80%), g8: (0.3, -20%), g9: (0.4, -20%), g10: (1.024, 90%), g11: (0.4, 40%), g12: (0.3, 15%), g13: (0.256, 90.3%).

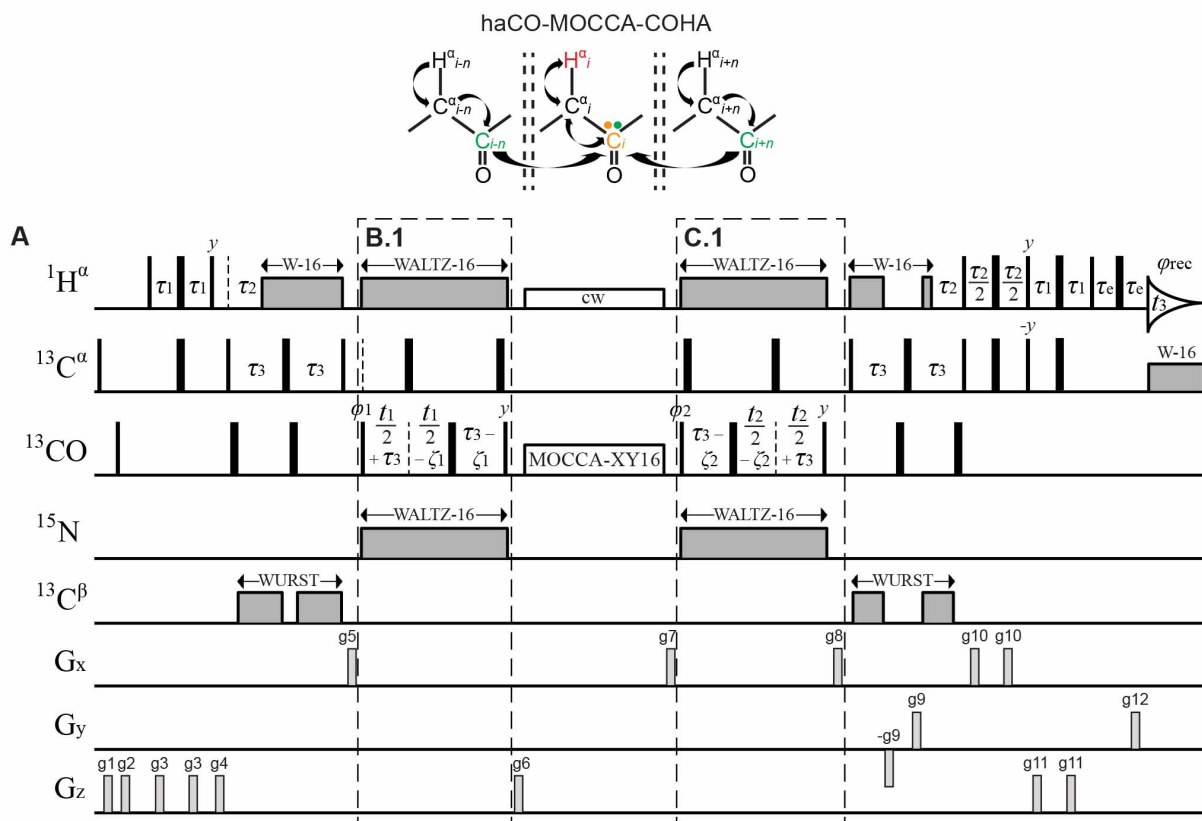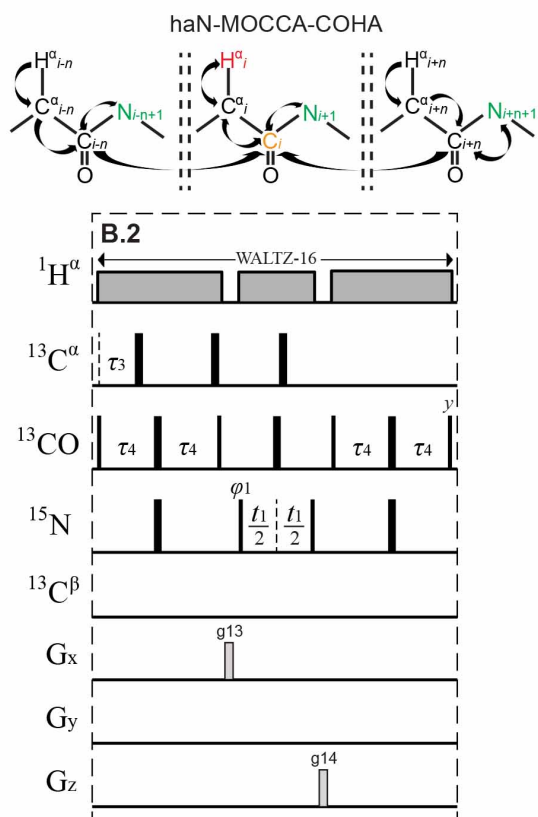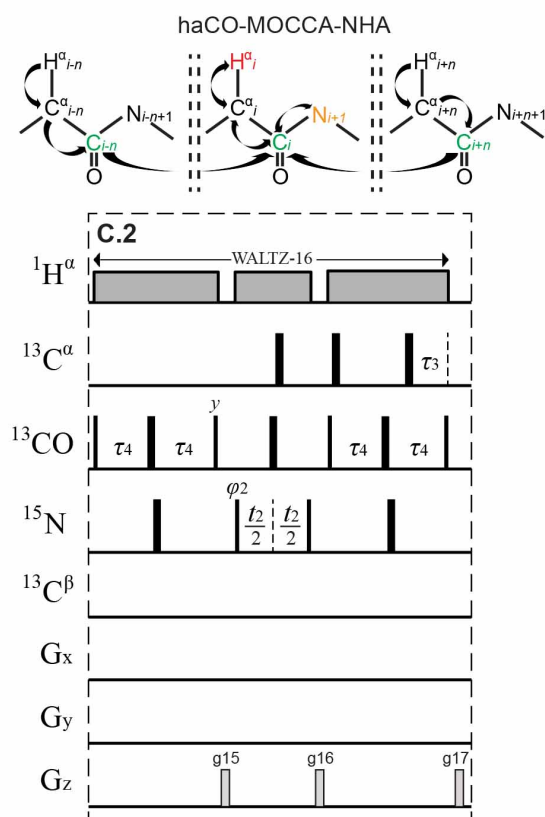

Figure S7. (A) Pulse sequence of the haCO-MOCCA-COHA experiment, providing correlations of the form  $(\dots, {}^{13}\text{CO}_{i-1}, {}^{13}\text{CO}_i, {}^{13}\text{CO}_{i+1}, \dots, {}^{13}\text{CO}_i, {}^1\text{H}^\alpha_i)$ . Many of the experimental details are identical to those described in Figure 2 and are not repeated.  ${}^1\text{H}$ ,  ${}^{13}\text{C}$ , and  ${}^{15}\text{N}$  carriers are placed on water ( $\sim 4.7$  ppm), 58 ppm (until immediately before the  ${}^{13}\text{CO}$  pulse of phase  $\varphi_1$  when the carrier is jumped to 176 ppm and then returned to 58 ppm after the C.1 or C.2 elements are completed), and 119 ppm, respectively. A  ${}^1\text{H}$  CW field of  $\sim 1.1$  kHz is applied during the MOCCA scheme to continuously dephase water. The MOCCA-XY16 scheme<sup>16,17</sup> is made up of  $\tau_{\text{MC}} - 180^\circ\varphi - \tau_{\text{MC}}$  elements, where  $\tau_{\text{MC}} = 4.32 \times \text{pulse length of each } {}^{13}\text{CO } \pi$  pulse, adjusted in length to have a null for the  ${}^{13}\text{C}^\alpha$  spins, and  $\varphi = 2(x,y), 2(y,x), 2(-x,-y), 2(-y,-x)$ . Complete 16 step cycles are repeated  $l$  times to give the total mixing time (300 ms used here). The delays are:  $\tau_1 = 1.8$  ms,  $\tau_2 = 3.6$  ms ( ${}^{13}\text{CH}$ ) or 2.3 ms ( ${}^{13}\text{CH} + {}^{13}\text{CH}_2$ ),  $\tau_3 = 4.5$  ms,  $\tau_4 = 15$  ms, and  $\tau_e$  accommodates the duration of gradient g12.  ${}^{13}\text{CO}$  chemical shift evolution during  $t_1$  and  $t_2$  make use of semi-constant time schemes<sup>14,15</sup> as depicted in (B.1) and (C.1). The delay  $\zeta_i$  is defined as  $\zeta_i = \{\tau_3/(n_i - 1)\} \times (\epsilon - 1)$ , where  $n_i$  is the total number of complex points in the time domain and  $\epsilon$  is set to the current complex  $t_i$  point number, ranging from 1 to  $n_i$ . Two other experiments, *i.e.* haN-MOCCA-COHA and haCO-MOCCA-NHA, can be performed by substituting (B.1) with (B.2), or (C.1) with (C.2), respectively. These two experiments involve additional magnetization transfers to  ${}^{15}\text{N}$  for chemical shift encoding in  $t_1$  and  $t_2$ , respectively so as to produce correlations of the form  $(\dots, {}^{15}\text{N}_i, {}^{15}\text{N}_{i+1}, {}^{15}\text{N}_{i+2}, \dots, {}^{13}\text{CO}_i, {}^1\text{H}^\alpha_i)$  (B.2) or  $(\dots, {}^{13}\text{CO}_{i-1}, {}^{13}\text{CO}_i, {}^{13}\text{CO}_{i+1}, \dots, {}^{15}\text{N}_{i+1}, {}^1\text{H}^\alpha_i)$  (C.2). The phase cycle used for the two MOCCA-COHA experiments is:  $\varphi_1 = x, -x$ ;  $\varphi_2 = 2(x), 2(-x)$ ; and  $\varphi_{\text{rec}} = x, 2(-x), x$ , while for the MOCCA-NHA scheme,  $\varphi_1 = 2(x), 2(-x)$ ;  $\varphi_2 = x, -x$ ; and  $\varphi_{\text{rec}} = x, 2(-x), x$ . Quadrature detection in  $t_1$  and  $t_2$  is achieved by STATES-TPPI<sup>10</sup> of  $\varphi_1$  and  $\varphi_2$ . Gradients are applied with the following durations (ms) and strengths (in % maximum): g1: (0.5, 24%), g2: (1.0, 24%), g3: (0.256, 15%), g4: (1.0, 40%), g5: (1.25, 80%), g6: (0.4, 25%), g7: (0.7, -50%), g8: (1.5, 80%), g9: (0.512, 90%), g10: (0.4, 40%), g11: (0.3, 15%), g12: (0.256, 90.3%), g13: (0.5, -40%), g14: (1.0, 15%), g15: (0.6, -50%), g16: (0.4, -30%), g17: (0.5, 20%). Magnetization transfer pathway of each experiment is depicted in separate cartoons, with chemical shift encoding color-coded as  $t_1$  (green),  $t_2$  (gold), and  $t_3$  (red). In the cartoon for scheme (A) the chemical shift of the  ${}^{13}\text{CO}$  that is labeled with both gold and green dots can be encoded during both  $t_1$  and  $t_2$  leading to a diagonal peak.

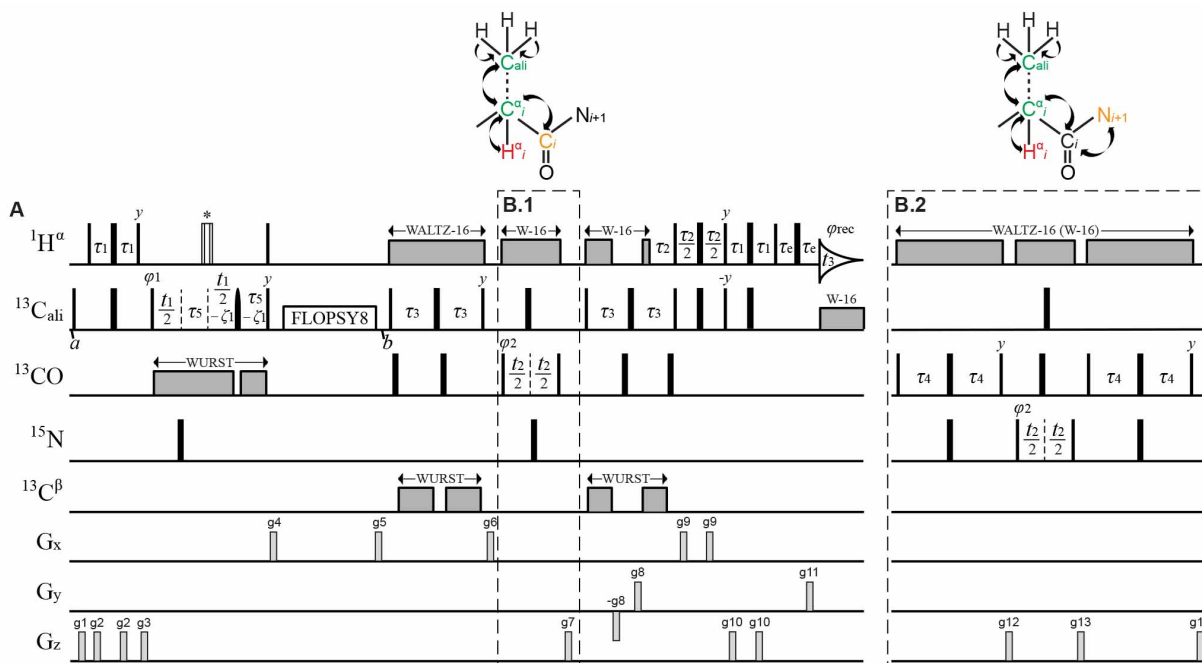

Figure S8. (A) Pulse sequence of the HCC-TOCSY-COHA experiment that generates correlations of the form  $(^{13}\text{C}_i, ^{13}\text{CO}_i, ^1\text{H}_i)$ , where  $^{13}\text{C}_i$  are aliphatic carbons from the sidechain of residue *i*. Many of the details are described in the legend to Figure 2 and are not repeated. The  $^{13}\text{C}$  carrier is initially positioned at 43 ppm (point *a*), shifted to 58 ppm at point *b*, to 176 ppm for the pulses in B.1 or B.2 and then back to 58 ppm. All  $^{13}\text{C}$  rectangular pulses prior to the FLOPSY mixing period<sup>18</sup> are applied with the highest possible power, with a 400  $\mu\text{s}$  REBURP pulse<sup>13</sup> during the  $t_1$  interval to refocus aliphatic magnetization (centered at 43 ppm, 15.7 kHz  $B_1$  field at maximum amplitude, 600 MHz).  $^{13}\text{C}^\alpha$ - $^{13}\text{CO}$  couplings are suppressed during  $t_1$  evolution through the application of  $^{13}\text{CO}$  WURST decoupling (sweep of 14 ppm, centered at 176 ppm, 4 ms adiabatic pulses). The FLOPSY-8 mixing sequence is applied with a field of  $\sim 8.3$  kHz for a total mixing time of 17 ms. Starting from point *b*,  $^{13}\text{C}_{\text{ali}} = ^{13}\text{C}^\alpha$  and  $^{13}\text{CO}$  90° and 180° rectangular pulses are applied with fields of  $\Delta\Omega/\sqrt{15}$  and  $\Delta\Omega/\sqrt{3}$ , respectively, where  $\Delta\Omega = 118$  ppm<sup>4</sup>. The  $^1\text{H}$  pulse denoted by an asterisk is of the composite variety<sup>19</sup>,  $90^\circ_y - 180^\circ_x - 90^\circ_y$ . The constant delays are:  $\tau_1 = 1.8$  ms,  $\tau_2 = 3.6$  ms ( $^{13}\text{CH}$ ) or 2.3 ms ( $^{13}\text{CH} + ^{13}\text{CH}_2$ ),  $\tau_3 = 4.5$  ms,  $\tau_4 = 15$  ms,  $\tau_5 = 1.15$  ms, and  $\tau_e$  is set to accommodate gradient  $g_{11}$ .  $^{13}\text{C}$  chemical shift evolution during  $t_1$  makes use of semi-constant time schemes<sup>14,15</sup> where the delay  $\zeta_1$  is defined as  $\zeta_1 = \{\tau_5/(n_1-1)\} \times (\epsilon-1)$ , where  $n_1$  is the total number of complex points in the time domain and  $\epsilon$  is set to the current complex  $t_1$  point number, ranging from 1 to  $n_1$ .  $^{15}\text{N}$  chemical shift can be encoded in  $t_2$  instead of  $^{13}\text{CO}$  by substituting (B.1) with (B.2). The phase cycle is:  $\phi_1 = x, -x$ ;  $\phi_2 = 2(x), 2(-x)$ ; and  $\phi_{\text{rec}} = x, 2(-x), x$ . Quadrature detection in  $t_1$  and  $t_2$  was achieved by STATES-TPPI<sup>10</sup> of  $\phi_1$  and  $\phi_2$ , respectively. Gradients are applied with the following durations (ms) and strengths (in % maximum):  $g_1$ : (0.5, 24%),  $g_2$ : (0.256, 15%),  $g_3$ : (1.0, 40%),  $g_4$ : (0.7, -50%),  $g_5$ : (0.7, -25%),  $g_6$ : (0.8, 80%),  $g_7$ : (0.4, 25%),  $g_8$ : (0.512, 90%),  $g_9$ : (0.4, 40%),  $g_{10}$ : (0.3, 15%),  $g_{11}$ : (0.256, 90.3%),  $g_{12}$ : (0.6, -50%),  $g_{13}$ : (0.4, -30%),  $g_{14}$ : (0.5, 20%). Magnetization transfer pathways of both experiments are depicted in separate cartoons, where chemical shift encoding is color-coded as  $t_1$  (green),  $t_2$  (gold), and  $t_3$  (red).



mode<sup>14,15</sup> as depicted in (B.1) and (B.2). (C) Sequences (C.1), (C.2), and (C.3) are used to measure  $R_1$ ,  $R_{1\rho}$ , and  $R_{2,SE}$ , respectively. Many of the details are as in the legend to Figure 2 and are not repeated. The  $^{13}\text{C}$  carrier is initially positioned at 58 ppm, shifted to 176 ppm at the start of block B and back to 58 ppm after the  $^{13}\text{CO}$   $90^\circ$  pulse of phase  $\varphi_4$ . In (C.1), a  $\tau_6$ - $180^\circ_x$ - $\tau_6$  element is repeated  $n$  times for the duration of  $T_{\text{relax}}$ , where  $^1\text{H}$   $180^\circ$  pulses are applied with a field that is 6 dB lower than maximum power, to suppress cross-correlation effects between  $^1\text{H}$ - $^{15}\text{N}$  dipolar and  $^{15}\text{N}$  CSA relaxation mechanisms. In (C.2) a 2 kHz  $^{15}\text{N}$  spin-lock field is employed for duration  $T_{\text{relax}}$ . Magnetization is ‘placed’ along the appropriate effective field using a 250 kHz adiabatically swept pulse of 4 ms duration, swept in the downfield direction, and swept upfield for the second pulse that positions the magnetization along the z axis. The  $^1\text{H}$  carrier is shifted to the center of the amide region at point  $a$  and subsequently back to water at  $b$ . Two composite  $90^\circ_y$ - $180^\circ_x$ - $90^\circ_y$   $^1\text{H}$  pulses are applied as indicated to suppress  $^1\text{H}$ - $^{15}\text{N}$  dipolar -  $^{15}\text{N}$  CSA cross-correlations<sup>20,21</sup>. We have found it necessary to include an  $^{15}\text{N}$  heat compensation element (dashed rectangle labeled CW at the start of the sequence) of duration  $T_{\text{relax,max}} - T_{\text{relax}}$ , where  $T_{\text{relax,max}}$  is the maximum  $T_{\text{relax}}$  value used. This ensures that uniform heating is applied for all relaxation delays. (C.3) ‘Pure’  $^{15}\text{N}$  magnetization is generated prior to the spin-echo period by refocusing  $^{15}\text{N}$  magnetization with respect to  $^{13}\text{C}^\alpha$  and  $^{13}\text{CO}$ . Subsequently,  $^{13}\text{C}^\alpha$  and  $^{13}\text{CO}$  WURST decoupling is achieved using a combined waveform that sweeps from 40 to 64 ppm (for  $^{13}\text{C}^\alpha$ ) and from 169 to 183 ppm (for  $^{13}\text{CO}$ ). The delays are:  $\tau_1 = 1.8$  ms,  $\tau_2 = 3.6$  ms ( $^{13}\text{CH}$ ) or 2.3 ms ( $^{13}\text{CH} + ^{13}\text{CH}_2$ ),  $\tau_3 = 4.5$  ms,  $\tau_4 = 15$  ms,  $\tau_5 = 4.9$  ms,  $\tau_6 = 2.5$  ms,  $\tau_7 = 16.5$  ms and  $\tau_e$  accommodates gradient g13. The phase cycle is:  $\varphi_1 = 2(x), 2(-x)$ ;  $\varphi_2 = 48.5^\circ$  (600 MHz);  $\varphi_3 = x, -x$ ;  $\varphi_4 = 48.5^\circ$  (600 MHz); and  $\varphi_{\text{rec}} = (x, -x, -x, x)$ . Quadrature detection in  $t_1$  and  $t_2$  is achieved by STATES-TPPI<sup>10</sup> of  $\varphi_1$  and  $\varphi_3$ , respectively. Gradients are applied with the following durations (ms) and strengths (in % maximum): g1: (0.5, 24%), g2: (1.0, 24%), g3: (0.256, 15%), g4: (1.0, 40%), g5: (1.25, 80%), g6: (1.5, 80%), g7: (0.9, 50%), g8: (0.9, 25%), g9: (1.0, 15%), g10: (0.512, 90%), g11: (0.4, 40%), g12: (0.3, 15%), g13: (0.256, 90.3%). The magnetization transfer pathway is depicted by the cartoon at the top, where chemical shift encoding is color-coded as  $t_1$  (green),  $t_2$  (gold), and  $t_3$  (red).

As described in the text, the  $R_1$  and  $R_{1\rho}$  relaxation experiments measure the decay of two-spin elements of the form  $^{15}\text{N}_j^{13}\text{CO}_z$  where  $j=z$  ( $R_1$ :  $^{15}\text{N}$  magnetization along the z-axis) or  $z'$  ( $R_{1\rho}$ :  $^{15}\text{N}$  magnetization locked along an effective axis that makes an angle  $\theta$  with respect to the z-axis where  $\theta = \arctan(v_l/\Delta\Omega)$ ,  $v_l$  is the spin-lock field strength and  $\Delta\Omega$  is the offset of the spin in question from the carrier<sup>22</sup>;  $\text{CO}_z$  is the z-component of CO-magnetization). In principle, it is possible to first refocus anti-phase  $^{15}\text{N}$  magnetization with respect to the attached  $^{13}\text{CO}$  spin and subsequently record the relaxation of pure  $^{15}\text{N}$  magnetization before reestablishing the two spin  $^{15}\text{N}_x^{13}\text{CO}_z$  coherence en route to detection. Although advantageous in that the  $^{13}\text{CO}$   $T_l$  would not enter into expressions for relaxation (unlike the case in Eqs 1-3 of the main text), the disadvantage is that a pair of additional delays must be inserted for refocusing anti-phase ( $^{15}\text{N}_x^{13}\text{CO}_z \rightarrow ^{15}\text{N}_x$ ) and defocusing in-phase ( $^{15}\text{N}_x \rightarrow ^{15}\text{N}_x^{13}\text{CO}_z$ )  $^{15}\text{N}$  magnetization. Our preference is, where possible, to maximize sensitivity as the anti-phase to in-phase to anti-phase cycle is associated with  $\sim 60$  ms of additional transverse relaxation. The situation for recording the decay of  $^{15}\text{N}$  magnetization via a simple spin-echo element (Figure panel C.3), that includes contributions from chemical exchange, is different. During the course of the  $T_{\text{relax}}$  period  $^{15}\text{N}$  magnetization interconverts between in-phase ( $^{15}\text{N}_x$ ) and anti-phase ( $^{15}\text{N}_x^{13}\text{CO}_z$ ) components. (Note that in the  $R_{1\rho}$  measurement this does not occur due to the 2 kHz  $^{15}\text{N}$  spin lock). Consequently, the effective relaxation rate during  $T_{\text{relax}}$  will vary with  $\tau$  as<sup>20</sup>,



$$R_{2,eff} = 0.5(R_{2,A} + R_{2,I}) + \frac{1}{2} \frac{\sin(2\pi J_{NCO} \tau)}{2\pi J_{NCO} \tau} (R_{2,A} - R_{2,I}), \quad 2\pi J_{NCO} \gg R_{2,A} - R_{2,I}$$

where  $R_{2,A}$  and  $R_{2,I}$  are the relaxation rates of  $^{15}\text{N}_x^{13}\text{CO}_z$  and  $^{15}\text{N}_x$ , respectively, and  $2\tau$  is the duration of  $T_{relax}$ . This produces non-exponential decay curves, and, of course, erroneous relaxation rates. For values of  $\tau = k/(2J_{NCO})$ ,  $k=0,1,2,\dots$ ,  $R_{2,eff} = 0.5(R_{2,A}+R_{2,I})$ , but this limits the values of  $\tau$  that can be chosen. We prefer, therefore, to ensure that  $^{15}\text{N}$  transverse magnetization remains in-phase for the duration of the  $T_{relax}$  element, requiring the use of simultaneous  $^{13}\text{C}^\alpha$  and  $^{13}\text{CO}$  decoupling schemes during this period. Finally, although it is tempting to forgo the extra evolution periods associated with refocusing and defocusing  $^{15}\text{N}$  magnetization and simply apply  $^{13}\text{CO}$  decoupling to anti-phase magnetization ( $^{15}\text{N}_x^{13}\text{CO}_z$ ) this would lead to erroneously short relaxation rates due to imperfections in decoupling.

Table S1

| Experiment                                                                                                                                                     | $t_{1\max}$<br>(ms) | $t_{2\max}$<br>(ms) | $t_{3\max}$<br>(ms) | NS  | Time<br>(hr) | Remarks                                                                                                     |
|----------------------------------------------------------------------------------------------------------------------------------------------------------------|---------------------|---------------------|---------------------|-----|--------------|-------------------------------------------------------------------------------------------------------------|
| <b>Dilute CAPRIN1, 25 mM NaPi, pH 7.4, 30 °C; Comparison of S/N of <math>^1\text{H}^\alpha</math>- vs <math>^{13}\text{C}</math>-detection</b>                 |                     |                     |                     |     |              |                                                                                                             |
| haCONHA                                                                                                                                                        | 64                  | 55                  | 64                  | 2   | 21           | $\tau_2 = 3.6$ ms, gradient coherence transfer selection (GCTS)                                             |
| ..                                                                                                                                                             | ..                  | ..                  | ..                  | 8   | 21           | $\tau_2 = 3.6$ ms, GCTS, nus = 26 %                                                                         |
| $^{13}\text{C}$ -haCON                                                                                                                                         | 55                  | 128                 |                     | 148 | 21           | $\tau_2 = 3.6$ ms; Acq data truncated to 64 ms prior to analysis – established that this did not affect S/N |
| haCONHA                                                                                                                                                        | 64                  | 55                  | 64                  | 2   | 3            | $\tau_2 = 3.6$ ms, GCTS, nus = 14 %                                                                         |
| $^{13}\text{C}$ -haCON                                                                                                                                         | 55                  | 128                 |                     | 20  | 3            | $\tau_2 = 3.6$ ms; Acq data truncated to 64 ms prior to analysis                                            |
| haCONHA                                                                                                                                                        | 64                  | 55                  | 64                  | 2   | 5            | $\tau_2 = 2.3$ ms, GCTS, nus = 25 %                                                                         |
| $^{13}\text{C}$ -haCON                                                                                                                                         | 55                  | 128                 |                     | 36  | 5            | $\tau_2 = 2.3$ ms; Acq data truncated to 64 ms prior to analysis                                            |
| <b>Condensed CAPRIN1, 25 mM NaPi, pH 7.4, 100 mM NaCl, 40 °C; Comparison of S/N of <math>^1\text{H}^\alpha</math>- vs <math>^{13}\text{C}</math>-detection</b> |                     |                     |                     |     |              |                                                                                                             |
| haCONHA                                                                                                                                                        | 64                  | 55                  | 64                  | 2   | 21           | $\tau_2 = 3.6$ ms, GCTS                                                                                     |
| $^{13}\text{C}$ -haCON                                                                                                                                         | 55                  | 128                 |                     | 148 | 21           | $\tau_2 = 3.6$ ms; Acq data truncated to 64 ms prior to analysis                                            |
| haCONHA                                                                                                                                                        | 64                  | 55                  | 64                  | 2   | 21           | $\tau_2 = 2.3$ ms, GCTS                                                                                     |
| $^{13}\text{C}$ -haCON                                                                                                                                         | 55                  | 128                 |                     | 148 | 21           | $\tau_2 = 2.3$ ms; Acq data truncated to 64 ms prior to analysis                                            |
| <b>Dilute CAPRIN1, 25 mM MES, pH 5.5, 25 °C; Comparison of S/N of <math>^1\text{H}^\alpha</math>- vs <math>^1\text{H}^\text{N}</math>-observe</b>              |                     |                     |                     |     |              |                                                                                                             |
| haCONHA                                                                                                                                                        | 50                  | 55                  | 64                  | 4   | 7            | $\tau_2 = 2.3$ ms, GCTS, nus = 16 %                                                                         |
| HNCO                                                                                                                                                           | 50                  | 55                  | 64                  | 4   | 7            | sensitivity-enhanced, water flip-back, nus = 16 %                                                           |
| <b>Dilute CAPRIN1, 25 mM HEPES, pH 7.4, 25 °C; Comparison of S/N of <math>^1\text{H}^\alpha</math>- vs <math>^1\text{H}^\text{N}</math>-observe</b>            |                     |                     |                     |     |              |                                                                                                             |
| haCONHA                                                                                                                                                        | 50                  | 55                  | 64                  | 4   | 8            | $\tau_2 = 2.3$ ms, GCTS, nus = 25 %                                                                         |
| HNCO                                                                                                                                                           | 50                  | 55                  | 64                  | 4   | 8            | sensitivity-enhanced, water flip-back, nus = 25 %                                                           |
| <b>Dilute CAPRIN1, 25 mM HEPES, pH 7.4, 30 °C; Assignment and Relaxation Studies</b>                                                                           |                     |                     |                     |     |              |                                                                                                             |
| haCONHA                                                                                                                                                        | 50                  | 55                  | 64                  | 4   | 8            | $\tau_2 = 2.3$ ms, GCTS, nus = 25 %                                                                         |

|                                                                                                  |     |    |    |    |    |                                                                                              |
|--------------------------------------------------------------------------------------------------|-----|----|----|----|----|----------------------------------------------------------------------------------------------|
| haNCOHA                                                                                          | 55  | 50 | 64 | 4  | 8  | $\tau_2 = 2.3$ ms, GCTS, nus = 25 %                                                          |
| haCO-MOCCA-COHA                                                                                  | 50  | 50 | 64 | 2  | 6  | $\tau_2 = 2.3$ ms, GCTS, nus = 30 %, $d_1 = 2$ s, mixing = 300 ms                            |
| haN-MOCCA-COHA                                                                                   | 55  | 50 | 64 | 2  | 10 | $\tau_2 = 2.3$ ms, GCTS, nus = 30 %, $d_1 = 2$ s, mixing = 300 ms                            |
| haCO-MOCCA-NHA                                                                                   | 53  | 55 | 64 | 2  | 11 | $\tau_2 = 2.3$ ms, GCTS, nus = 30 %, $d_1 = 2$ s, mixing = 300 ms                            |
| HCC-TOCSY-COHA                                                                                   | 7   | 53 | 64 | 4  | 5  | $\tau_2 = 2.3$ ms, GCTS, nus = 30 %, $d_1 = 1$ s, mixing = 17 ms                             |
| $R_{1p}$                                                                                         | 0   | 49 | 64 | 12 | 11 | $\tau_2 = 2.3$ ms, GCTS, $d_1 = 2$ s, $T_{\text{relax}} = \{5, 50, 100, 150, 200, 248\}$     |
| $R_1$                                                                                            | 0   | 49 | 64 | 12 | 4  | $\tau_2 = 2.3$ ms, GCTS, $d_1 = 1$ s, $T_{\text{relax}} = \{10, 50, 125, 250\}$ ms}          |
| $R_{2,SE}$                                                                                       | 0   | 49 | 64 | 12 | 4  | $\tau_2 = 2.3$ ms, GCTS, $d_1 = 1$ s, $T_{\text{relax}} = \{0, 50, 100, 150, 200\}$ ms}      |
| <b>Dilute CAPRIN1, 25 mM HEPES, pH 7.4, 2.5 mM PPI, 30 °C; Assignment and Relaxation Studies</b> |     |    |    |    |    |                                                                                              |
| haCONHA                                                                                          | 50  | 55 | 64 | 4  | 8  | $\tau_2 = 2.3$ ms, GCTS, nus = 25 %                                                          |
| HCC-TOCSY-COHA                                                                                   | 7.5 | 53 | 64 | 4  | 11 | $\tau_2 = 2.3$ ms, GCTS, nus = 50 %, $d_1 = 1$ s, mixing = 17 ms                             |
| $R_{1p}$                                                                                         | 0   | 49 | 64 | 12 | 11 | $\tau_2 = 2.3$ ms, GCTS, $d_1 = 2$ s, $T_{\text{relax}} = \{5, 50, 100, 150, 200, 248\}$ ms} |
| $R_1$                                                                                            | 0   | 49 | 64 | 12 | 4  | $\tau_2 = 2.3$ ms, GCTS, $d_1 = 1$ s, $T_{\text{relax}} = \{10, 50, 125, 250, 50\}$ ms}      |
| $R_{2,SE}$                                                                                       | 0   | 49 | 64 | 12 | 4  | $\tau_2 = 2.3$ ms, GCTS, $d_1 = 1$ s, $T_{\text{relax}} = \{0, 50, 100, 150, 200\}$ ms}      |
|                                                                                                  |     |    |    |    |    |                                                                                              |

## References

- (1) Kay, L. E.; Xu, G. Y.; Yamazaki, T. Enhanced-Sensitivity Triple-Resonance Spectroscopy with Minimal H<sub>2</sub>O Saturation. *J. Magn. Reson. Ser. A* **1994**, *109* (1), 129–133. <https://doi.org/10.1006/jmra.1994.1145>.
- (2) Yuwen, T.; Skrynnikov, N. R. CP-HISQC: A Better Version of HSQC Experiment for Intrinsically Disordered Proteins under Physiological Conditions. *J. Biomol. NMR* **2014**, *58* (3), 175–192. <https://doi.org/10.1007/s10858-014-9815-5>.
- (3) Shaka, A. J.; Keeler, J.; Frenkiel, T.; Freeman, R. An Improved Sequence for Broadband Decoupling: WALTZ-16. *J. Magn. Reson.* **1983**, *52* (2), 335–338. [https://doi.org/10.1016/0022-2364\(83\)90207-X](https://doi.org/10.1016/0022-2364(83)90207-X).
- (4) Kay, L. E.; Ikura, M.; Tschudin, R.; Bax, A. Three-Dimensional Triple-Resonance NMR Spectroscopy of Isotopically Enriched Proteins. *J. Magn. Reson.* **1990**, *89* (3), 496–514. [https://doi.org/10.1016/0022-2364\(90\)90333-5](https://doi.org/10.1016/0022-2364(90)90333-5).
- (5) Vuister, G. W.; Bax, A. Resolution Enhancement and Spectral Editing of Uniformly <sup>13</sup>C-Enriched Proteins by Homonuclear Broadband <sup>13</sup>C Decoupling. *J. Magn. Reson.* **1992**, *98* (2), 428–435. [https://doi.org/10.1016/0022-2364\(92\)90144-V](https://doi.org/10.1016/0022-2364(92)90144-V).
- (6) Kupče, Ě.; Freeman, R. Adiabatic Pulses for Wideband Inversion and Broadband Decoupling. *J. Magn. Reson. Ser. A* **1995**, *115* (2), 273–276. <https://doi.org/10.1006/jmra.1995.1179>.
- (7) Kupče, E.; Wagner, G. Multisite Band-Selective Decoupling in Proteins. *J. Magn. Reson. - Ser. B* **1996**, *110* (3), 309–312. <https://doi.org/10.1006/jmrb.1996.0048>.
- (8) Yang, D.; Nagayama, K. A Sensitivity-Enhanced Method for Measuring Heteronuclear Long-Range Coupling Constants from the Displacement of Signals in Two 1D Subspectra. *J. Magn. Reson. - Ser. A* **1996**, *118* (1), 117–121. <https://doi.org/10.1006/jmra.1996.0017>.
- (9) Ottiger, M.; Delaglio, F.; Bax, A. Measurement of J and Dipolar Couplings from Simplified Two-Dimensional NMR Spectra. *J. Magn. Reson.* **1998**, *131* (2), 373–378. <https://doi.org/10.1006/jmre.1998.1361>.
- (10) Marion, D.; Ikura, M.; Tschudin, R.; Bax, A. Rapid Recording of 2D NMR Spectra without Phase Cycling. Application to the Study of Hydrogen Exchange in Proteins. *J. Magn. Reson.* **1989**, *85* (2), 393–399. [https://doi.org/10.1016/0022-2364\(89\)90152-2](https://doi.org/10.1016/0022-2364(89)90152-2).
- (11) Kay, L. E.; Keifer, P.; Saarinen, T. Pure Absorption Gradient Enhanced Heteronuclear Single Quantum Correlation Spectroscopy with Improved Sensitivity. *J. Am. Chem. Soc.* **1992**, *114* (26), 10663–10665. <https://doi.org/10.1021/ja00052a088>.
- (12) Schleucher, J.; Sattler, M.; Griesinger, C. Coherence Selection by Gradients without Signal Attenuation: Application to the Three-Dimensional HNCQ Experiment. *Angew. Chemie Int. Ed. English* **1993**, *32* (10), 1489–1491. <https://doi.org/10.1002/anie.199314891>.
- (13) Geen, H.; Freeman, R. Band-Selective Radiofrequency Pulses. *J. Magn. Reson.* **1991**, *93* (1), 93–141. [https://doi.org/10.1016/0022-2364\(91\)90034-Q](https://doi.org/10.1016/0022-2364(91)90034-Q).
- (14) Grzesiek, S.; Anglister, J.; Bax, A. Correlation of Backbone Amide and Aliphatic Side-Chain Resonances in <sup>13</sup>C/<sup>15</sup>N-Enriched Proteins by Isotropic Mixing of <sup>13</sup>C Magnetization. *J. Magn. Reson. Ser. B* **1993**, *101* (1), 114–119. <https://doi.org/10.1006/jmrb.1993.1019>.
- (15) Logan, T. M.; Olejniczak, E. T.; Xu, R. X.; Fesik, S. W. A General Method for Assigning NMR

- Spectra of Denatured Proteins Using 3D HC(CO)NH-TOCSY Triple Resonance Experiments. *J. Biomol. NMR* **1993**, 3 (2), 225–231. <https://doi.org/10.1007/BF00178264>.
- (16) Furrer, J.; Kramer, F.; Marino, J. P.; Glaser, S. J.; Luy, B. Homonuclear Hartmann-Hahn Transfer with Reduced Relaxation Losses by Use of the MOCCA-XY16 Multiple Pulse Sequence. *J. Magn. Reson.* **2004**, 166 (1), 39–46. <https://doi.org/10.1016/j.jmr.2003.09.013>.
  - (17) Yoshimura, Y.; Kulinskaya, N. V.; Mulder, F. A. A. Easy and Unambiguous Sequential Assignments of Intrinsically Disordered Proteins by Correlating the Backbone  $^{15}\text{N}$  or  $^{13}\text{C}$  Chemical Shifts of Multiple Contiguous Residues in Highly Resolved 3D Spectra. *J. Biomol. NMR* **2015**, 61 (2), 109–121. <https://doi.org/10.1007/s10858-014-9890-7>.
  - (18) Kadkhodaie, M.; Rivas, O.; Tan, M.; Mohebbi, A.; Shaka, A. J. Broadband Homonuclear Cross Polarization Using Flip-Flop Spectroscopy. *J. Magn. Reson.* **1991**, 91 (2), 437–443. [https://doi.org/10.1016/0022-2364\(91\)90210-K](https://doi.org/10.1016/0022-2364(91)90210-K).
  - (19) Leviti, M. H.; Freeman, R. NMR Population Inversion Using a Composite Pulse. *J. Magn. Reson.* **1979**, 33 (2), 473–476. [https://doi.org/10.1016/0022-2364\(79\)90265-8](https://doi.org/10.1016/0022-2364(79)90265-8).
  - (20) Palmer, A. G.; Skelton, N. J.; Chazin, W. J.; Wright, P. E.; Rance, M. Suppression of the Effects of Cross-Correlation between Dipolar and Anisotropic Chemical Shift Relaxation Mechanisms in the Measurement of Spin-Spin Relaxation Rates. *Mol. Phys.* **1992**, 75 (3), 699–711. <https://doi.org/10.1080/00268979200100511>.
  - (21) Kay, L. E.; Nicholson, L. K.; Delaglio, F.; Bax, A.; Torchia, D. A. Pulse Sequences for Removal of the Effects of Cross Correlation between Dipolar and Chemical-Shift Anisotropy Relaxation Mechanisms on the Measurement of Heteronuclear  $T_1$  and  $T_2$  Values in Proteins. *J. Magn. Reson.* **1992**, 97 (2), 359–375. [https://doi.org/10.1016/0022-2364\(92\)90320-7](https://doi.org/10.1016/0022-2364(92)90320-7).
  - (22) Palmer, A. G.; Kroenke, C. D.; Loria, J. P. Nuclear Magnetic Resonance Methods for Quantifying Microsecond-to-Millisecond Motions in Biological Macromolecules. In *Methods in Enzymology*; 2001; Vol. 339, pp 204–238. [https://doi.org/10.1016/S0076-6879\(01\)39315-1](https://doi.org/10.1016/S0076-6879(01)39315-1).
